# Supplementary material for: Vitamin D levels and deficiency with different occupations: a systematic review
Source: Springer Nature journal article supplement (doi:10.1186/s12889-017-4436-z), 2017-05-26

Supplementary Fig. 2

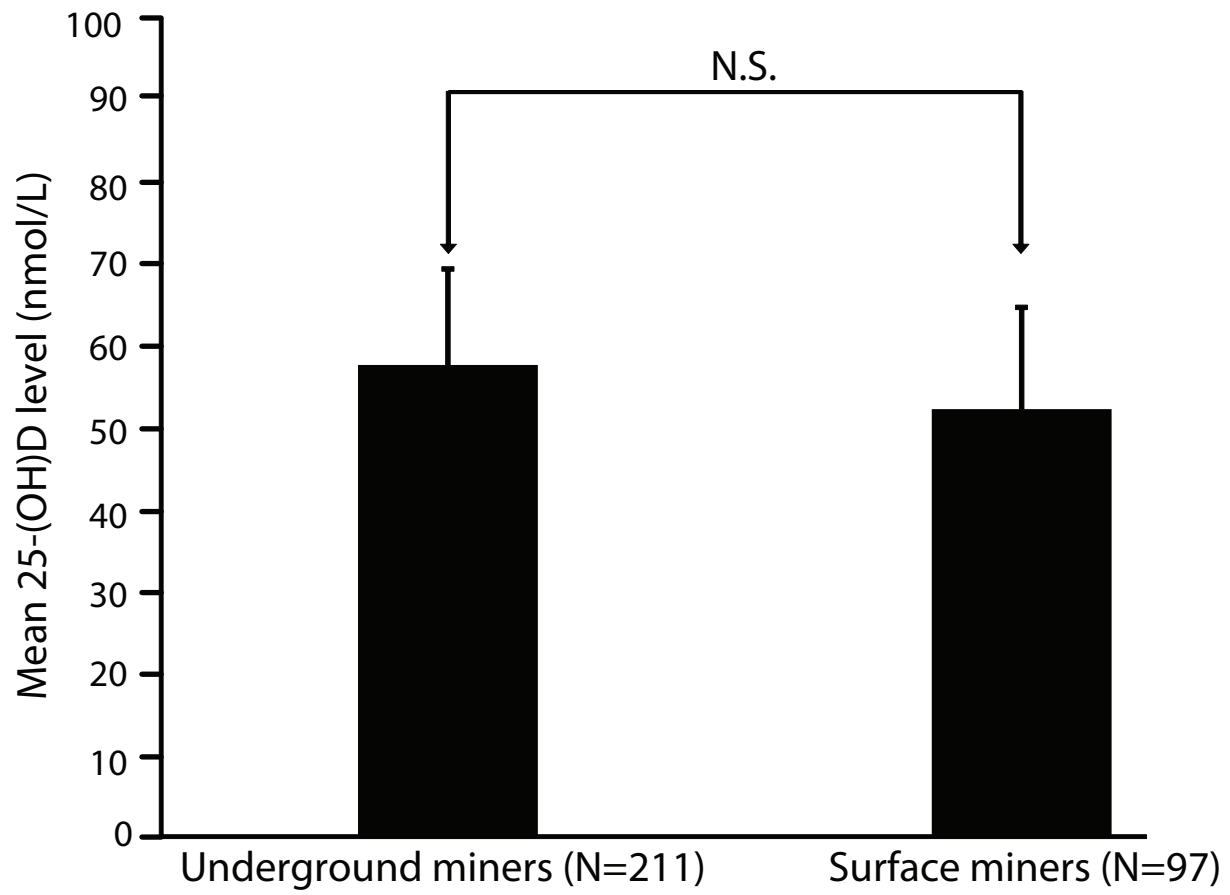

Supplement: MOESM7 [file 12461540]
