# Supplementary material for: Vitamin D levels and deficiency with different occupations: a systematic review
Source: BMC Public Health. 2017 Jun 22;17:519. doi: 10.1186/s12889-017-4436-z (PMC5480134; doi:10.1186/s12889-017-4436-z)
Supplement: Supplementary file 3 — 25-(OH)D levels. Figure S4A. Effect of latitude on serum 25-(OH)D levels in all occupational groups examined. Each data point represents mean ± standard error of the mean of each included study. Inset: symbols and colors of each occupational subgroup. N/S: Northern/Southern hemisphere. Figure S4B. Comparison of serum 25-(OH)D levels in indoor and outdoor workers according to latitude. Each data point represents mean ± standard error of the mean of studies of outdoor and indoor workers included in the analysis. Inset: symbols and colors of each occupational subgroup. N/S: Northern/Southern hemisphere. Figure S4C. Comparison of serum 25-(OH)D levels in healthcare workers according to latitude. Each data point represents mean ± standard error of the mean of studies of each healthcare workers included in the analysis. Inset: symbols and colors of each occupational subgroup. N/S: Northern/Southern hemisphere. (ZIP 229 kb) [file 12889_2017_4436_MOESM3_ESM.zip]

Archive with 3 entries (3 files):
- Suppl Fig. 4A Latitude and 25-(OH)D levelsR3.pdf
- Suppl Fig. 4B Latitude and 25-(OH)D outdoor indoorR3.pdf
- Suppl Fig. 4C Latitude and 25-(OH)D healthcareR3.pdf
