# Supplementary material for: Vitamin D levels and deficiency with different occupations: a systematic review
Source: BMC Public Health. 2017 Jun 22;17:519. doi: 10.1186/s12889-017-4436-z (PMC5480134; doi:10.1186/s12889-017-4436-z)
Supplement: Supplementary file 5 — Latitude and % vitamin D deficiency. Figure S5A. Effect of latitude on % vitamin D deficiency in all the occupational groups included in analysis. Percent vitamin D deficiency was defined as the number of subjects of a particular study with mean 25-(OH)D levels less than 50 nmol/L. Inset: symbols and colors of each occupational subgroup. N/S: Northern/Southern hemisphere. Figure S5B. Effect of latitude on % vitamin D deficiency in indoor and outdoor workers included in the analysis. Inset: symbols and colors of each occupational subgroup. N/S: Northern/Southern hemisphere. Figure S5C. Effect of latitude on % vitamin D deficiency in healthcare employees included in the analysis. Inset: symbols and colors of each occupational subgroup. N/S: Northern/Southern hemisphere. (ZIP 195 kb) [file 12889_2017_4436_MOESM5_ESM.zip]

Archive with 3 entries (3 files):
- Suppl Fig. 5A Latitude and % vitamin D deficiencyR3.pdf
- Suppl Fig. 5B Latitude and % vitamin D def out inR3.pdf
- Suppl Fig. 5C Latitude and % vitamin D def healthcareR3.pdf
