# Supplementary material for: Vitamin D levels and deficiency with different occupations: a systematic review
Source: BMC Public Health. 2017 Jun 22;17:519. doi: 10.1186/s12889-017-4436-z (PMC5480134; doi:10.1186/s12889-017-4436-z)
Supplement: Supplementary file 6 — Latitude and % vitamin D deficiency or insufficiency. Figure S6A. Effect of latitude on % vitamin D deficiency or insufficiency in all occupational groups examined. Percent vitamin D insufficiency was defined as the number of subjects of a particular study with mean 25-(OH)D levels less than 75 nmol/L. Inset: symbols and colors of each occupational group. N/S: Northern/Southern hemisphere. Figure S6B. Effect of latitude on % vitamin D deficiency or insufficiency in indoor and outdoor workers. Inset: symbols and colors of each occupational subgroup. N/S: Northern/Southern hemisphere. Figure S6C. Effect of latitude on % vitamin D deficiency or insufficiency in healthcare professionals. Inset: symbols and colors of each occupational subgroup. N/S: Northern/Southern hemisphere. (ZIP 189 kb) [file 12889_2017_4436_MOESM6_ESM.zip]

Archive with 3 entries (3 files):
- Suppl Fig. 6A Latitude and % vitamin D def or insuffR3.pdf
- Suppl Fig. 6B Latitude and % vitamin D def insuff out inR3.pdf
- Suppl Fig. 6C Latitude and % vitamin D def insuff healthcareR3.pdf
